# Supplementary material for: A bodipy based fluorescent probe for evaluating and identifying cancer, normal and apoptotic C6 cells on the basis of changes in intracellular viscosity
Source: Royal Society of Chemistry journal article supplement (doi:10.1039/c5tb02476e), 2016-01-01
Supplement: c5tb02476e2.pdf [file c5tb02476e2.pdf]

## **Electronic Supplementary Information**

### **A bodipy based fluorescent probe for evaluating and identifying cancer, normal and apoptotic C6 cells on the basis of changes in intracellular viscosity**

*Neha Gupta<sup>†</sup>, Shahi Imam Reja<sup>†</sup>, Vandana Bhalla<sup>†</sup>, Muskan Gupta<sup>‡</sup>, Gurcharan Kaur<sup>‡</sup> and Manoj Kumar<sup>†\*</sup>*

*<sup>†</sup>Department of Chemistry, UGC Sponsored Centre for Advanced Studies-I and <sup>‡</sup>Department of Biotechnology, Guru Nanak Dev University, Amritsar, Punjab, India.*

*Fax: +91 (0)183 2258820; Tel: +91 (0)183 2258802 Ex3205;*

*E-mail: [mksharmaa@yahoo.co.in](mailto:mksharmaa@yahoo.co.in)*

- S3 Synthetic scheme for probe **1** and compound **2**
- S4 <sup>1</sup>H NMR spectrum of compound **2**
- S5 <sup>13</sup>C NMR spectrum of compound **2**
- S5 Mass spectrum of compound **2**
- S6 Lifetime of probe **1** in different viscosity medium (0-99% methanol:glycerol fractions)
- S7 Fluorescence time resolved spectra of probe **1** in methanol-glycerol (1:1, v/v) with varying temperature (80-0°C)
- S7 Fluorescence lifetime of probe **1** recorded in methanol–glycerol mixtures of various compositions, plotted against viscosity of the mixture. The data represented at temperatures between 293 and 333 K
- S8 Plot of linear relationship of log I<sub>517</sub> and log η
- S8 Fluorescence and fluorescence lifetime spectra of compound **2** (5.0 μM) in different methanol-glycerol fractions (0 to 99%); λ<sub>em</sub> = 510 nm and λ<sub>ex</sub> = 470 and 488nm.
- S9-10 VT-<sup>1</sup>H NMR spectra of probe **1**.
- S11 Fluorescence and fluorescence lifetime spectra of probe **1** (5.0 μM) at 517 nm in different solvent system in 25 °C; λ<sub>ex</sub> = 470 and 488 nm.
- S12 Effect of pH on the fluorescence emission intensity of probe **1** and pK<sub>a</sub> value plot
- S13 Fluorescence spectra and Bar diagram of probe **1** (5.0 μM) in methanol with addition of different analytes

- S14 Representation of optimized geometry of probe **1** in gas phase
- S15 DFT studies of probe **1** in different solvents (polar and non-polar)
- S16 Energy profile of probe **1** molecular orbitals in different solvents and at different dihedral angle
- S17 Plot of energy gap between the  $S_0$  and  $S_1$  states of probe **1** with different dihedral angle ( $\phi$ ) around the C36-C21-C10-C11.
- S18 Plot depicting the variation of  $S_0$  - $S_1$  energy gap at different dihedral angles in case of compound **2**
- S19 MTT data of probe **1** for 24 hrs.
- S19 Fluorescence spectra of probe **1** (5.0  $\mu$ M) in water on addition of retinoic acid (30  $\mu$ M) at 25  $^{\circ}$ C;  $\lambda_{\text{ex}}$  = 470 nm.
- S20 Bar graph depicting the relative fluorescence intensity of the probe **1** (5  $\mu$ M) in cell based model system
- S20 Flow cytometer and immunocytofluorescence studies in cell based model system
- S21 Cell imaging and intensity analysis of probe **1** in cell based model system of cancer and normal cells i.e., in C6 and BV2 cells
- S22 Control experiment of probe **1** in C6 glial cells without addition of camptothecin
- S23 TCSPC histogram of cell model system and lifetime of probe **1** in cells.
- S24 Calibration plot of life time for probe **1** recorded in methanol-glycerol mixtures of various compositions, plotted against the viscosity of mixtures.
- S25 Procedure for cell culture and fluorescence detection

## Synthetic routes and characteristic data

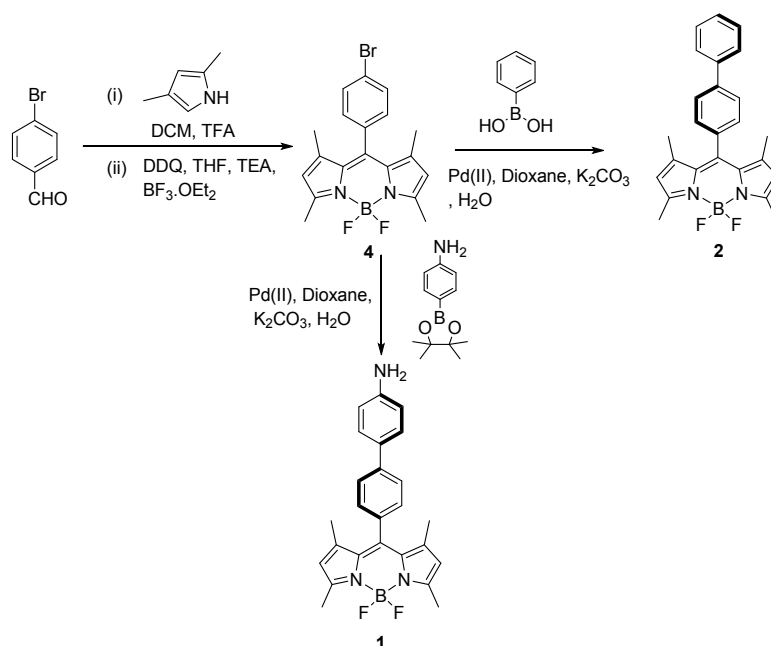

**Scheme S1:** Synthesis of probe 1 and compound 2

### Synthesis of probe 1:

To a solution of 4 (0.30 g, 0.744 mmol) and boronic ester of aniline (0.19 g, 0.893 mmol) in dioxane (20 ml) were added  $\text{K}_2\text{CO}_3$  (0.41 g, 2.977 mmol), distilled water (1 mL), and  $[\text{Pd}(\text{Cl})_2(\text{PPh}_3)_2]$  (0.31 g, 0.44 mmol) under nitrogen. The reaction mixture was then refluxed overnight. The dioxane was then removed under vacuum, and the residue so obtained was extracted with dichloromethane, and dried over anhydrous  $\text{Na}_2\text{SO}_4$ . The organic layer was removed, and the compound was purified by column chromatography using hexane/chloroform (6:4) as an eluent to give 0.176 g (57 %) of probe 1 as orange coloured solid.  $^1\text{H}$  NMR ( $\text{CDCl}_3$ , 400 MHz, ppm) 1.40 (s, 6 H), 2.56 (s, 6 H), 3.70 (s, 2H), 5.99 (s, 2 H), 6.80 (d,  $J = 8$  Hz, 2 H), 7.29 (d,  $J = 8$ , 2 H), 7.51 (d,  $J = 8$ , 2 H), 7.68 (d,  $J = 8$ , 2 H).  $^{13}\text{C}$  NMR ( $\text{CDCl}_3$ , 100 MHz,  $\delta = \text{ppm}$ ) = 29.32, 66.84, 115.16, 117.17, 121.14, 126.39, 127.99, 128.37, 131.29, 134.93, 135.24, 143.16, 145.46, 155.30; IR (KBr)  $\nu_{\text{max}} = 3496 \text{ cm}^{-1}$  (primary aromatic amine) and  $3399 \text{ cm}^{-1}$  (NH-stretch). TOF MS  $\text{ES}^+$ ,  $m/z$ : 416.2136 ( $\text{M}+\text{H}^+$ ). HRMS data for  $\text{C}_{25}\text{H}_{24}\text{BF}_2\text{N}_3$ : Found: 416.2105 ( $\text{M}+\text{H}^+$ ); calculated: 416.2109 ( $\text{M}+\text{H}^+$ ).

# **<sup>1</sup>H NMR spectrum of compound 2**

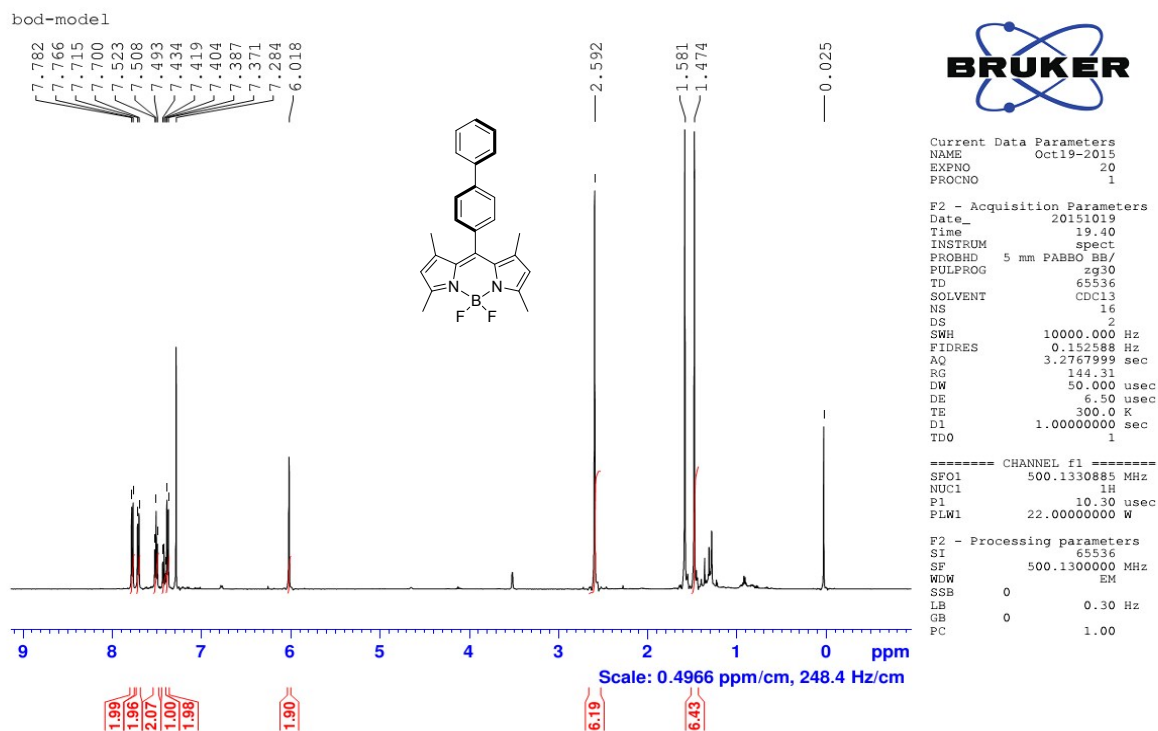

**Fig. S1: <sup>1</sup>H NMR spectrum of compound 2**

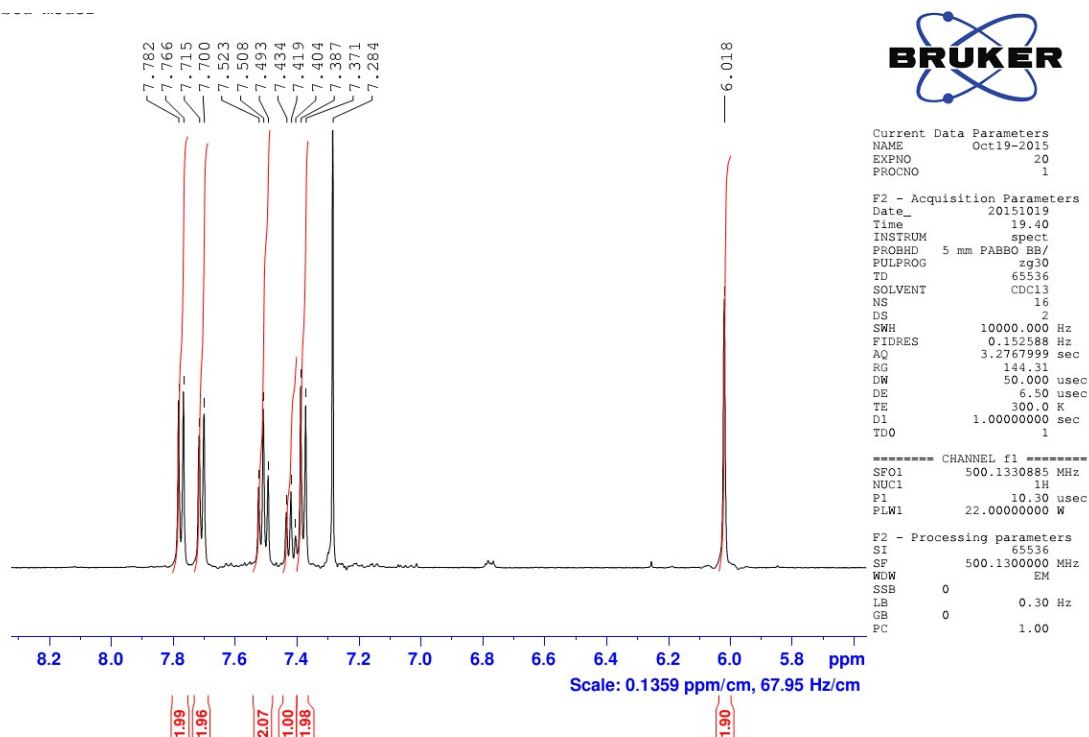

## <sup>13</sup>C NMR and mass spectrum of compound 2

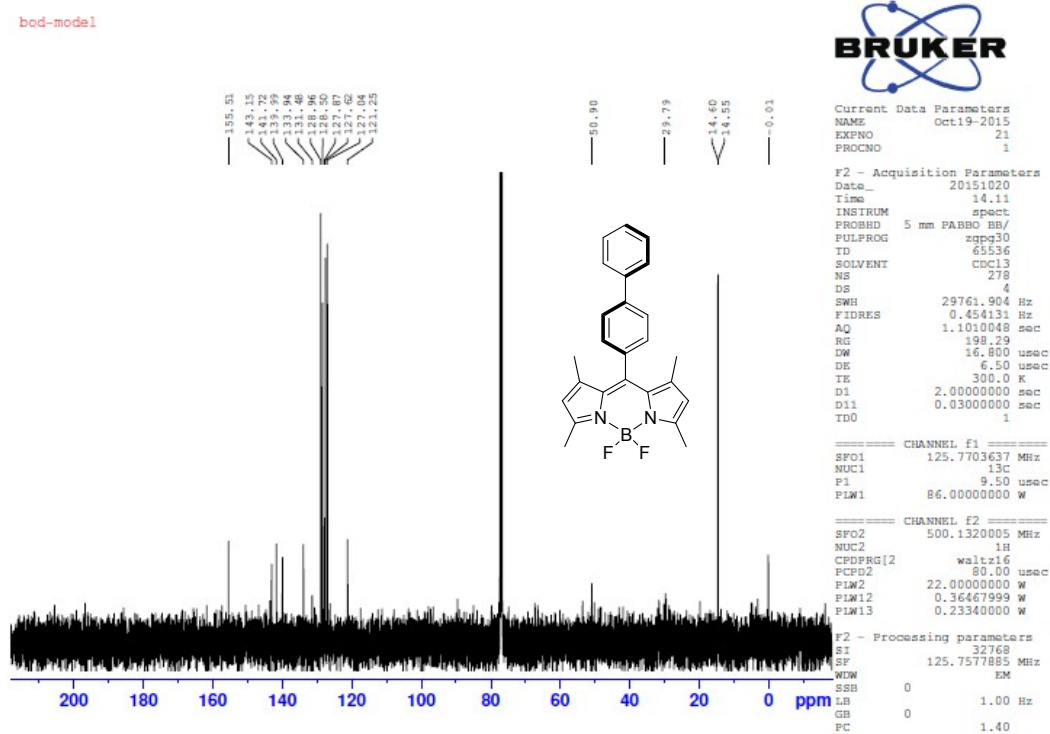

**Fig. S2:** <sup>13</sup>C NMR spectrum of compound 2

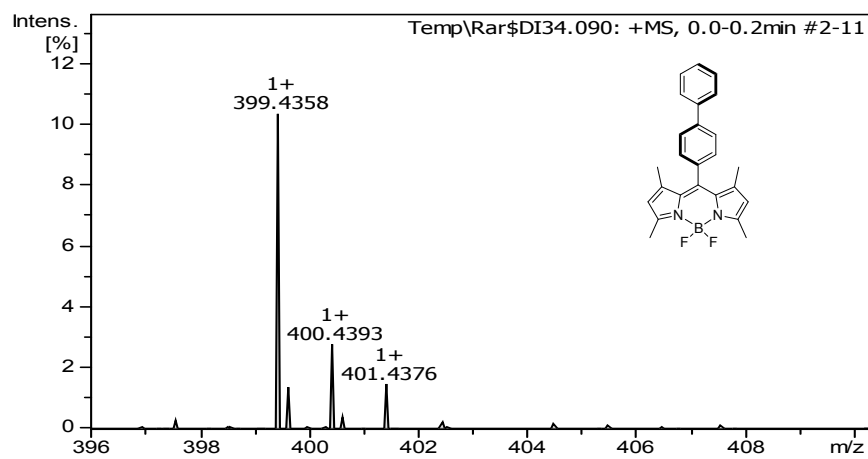

**Fig. S3:** Mass spectrum of compound 2

**Lifetime data of probe 1 in different methanol glycerol fractions**

| <b>Methanol: Glycerol<br/>(v/v)</b> | <b>Probe 1 (lifetime in ns)</b> |
|-------------------------------------|---------------------------------|
| <b>10:0</b>                         | <b>2.35</b>                     |
| <b>9:1</b>                          | <b>2.65</b>                     |
| <b>8:2</b>                          | <b>2.74</b>                     |
| <b>7:3</b>                          | <b>2.81</b>                     |
| <b>6:4</b>                          | <b>3.02</b>                     |
| <b>5:5</b>                          | <b>3.12</b>                     |
| <b>4:6</b>                          | <b>3.31</b>                     |
| <b>3:7</b>                          | <b>3.54</b>                     |
| <b>2:8</b>                          | <b>3.82</b>                     |
| <b>1:9</b>                          | <b>3.96</b>                     |
| <b>0:10</b>                         | <b>4.35</b>                     |

**Table S1:** Lifetime of probe 1 (5.0  $\mu\text{M}$ ) in different methanol: glycerol fractions at 517 nm using  $\lambda_{\text{ex}} = 488$  nm

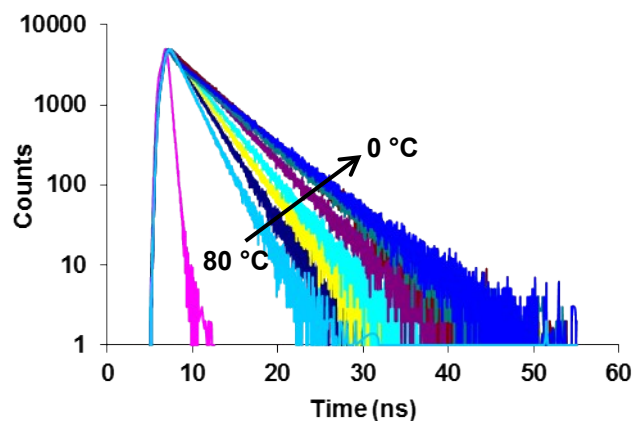

**Fig. S4:** Fluorescence lifetime spectra of probe **1** (5.0  $\mu\text{M}$ ) at 517 nm in methanol-glycerol (1:1, v/v) system with varying temperature 0-80  $^{\circ}\text{C}$ ;  $\lambda_{\text{ex}}$  = 488 nm.

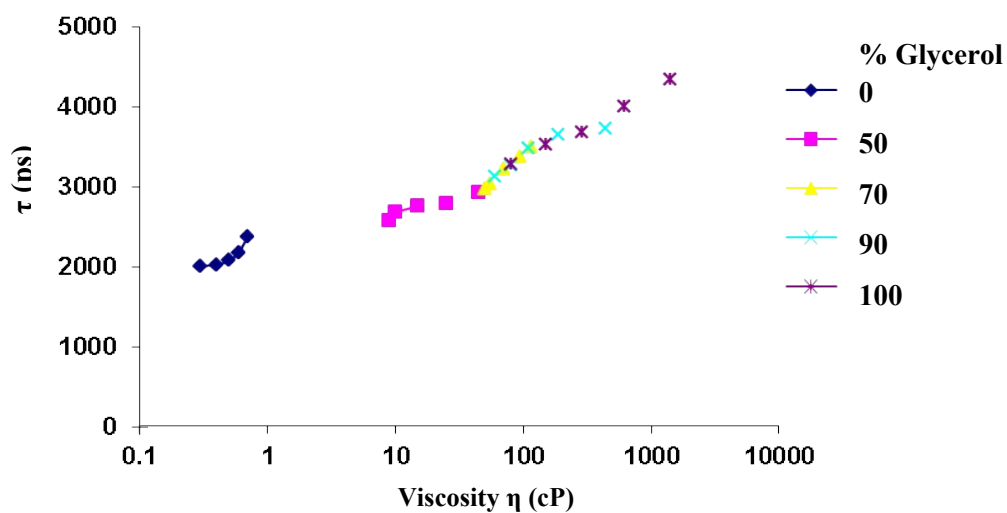

**Fig. S5:** Fluorescence lifetime of probe **1** recorded in methanol-glycerol mixtures of various compositions, plotted against viscosity of the mixture. The data represented at temperatures between 293 and 333 K.

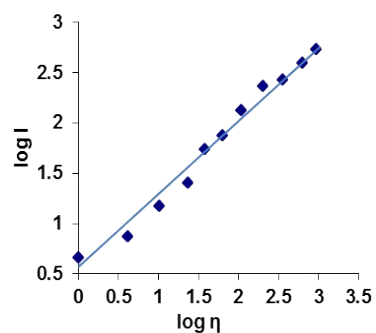

**Fig. S6:** Linear relationship of  $\log I_{517}$  and  $\log \eta$ ,  $R^2 = 0.9914$ ,  $X = 0.52$

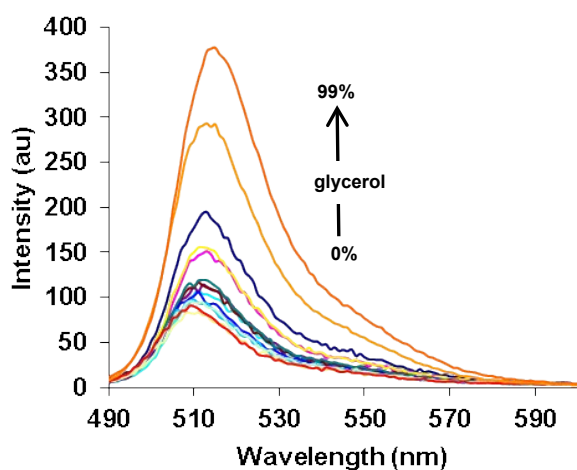

**Fig. S7:** Fluorescence spectra of compound **2** ( $5.0 \mu\text{M}$ ) at nm in varying methanol-glycerol (0-99%) fractions at  $\lambda_{\text{em}} = 510$  and  $\lambda_{\text{ex}} = 470$  nm.

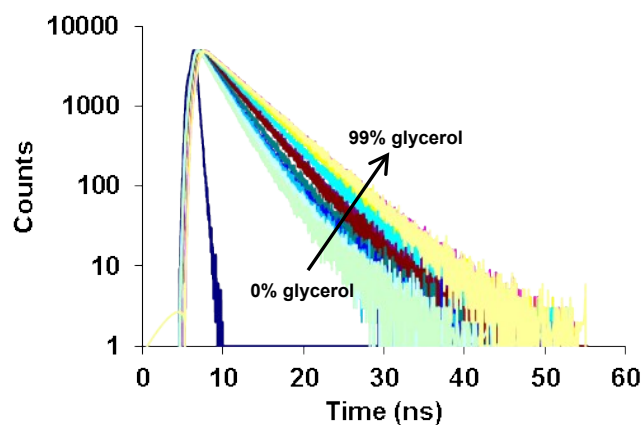

**Fig. S8:** Fluorescence lifetime spectra of compound **2** ( $5.0 \mu\text{M}$ ) at 510 nm in varying methanol-glycerol (0-99%) fractions  $\lambda_{\text{ex}} = 488$  nm.



**Variable temperature  $^1\text{H}$  NMR spectra of probe 1**

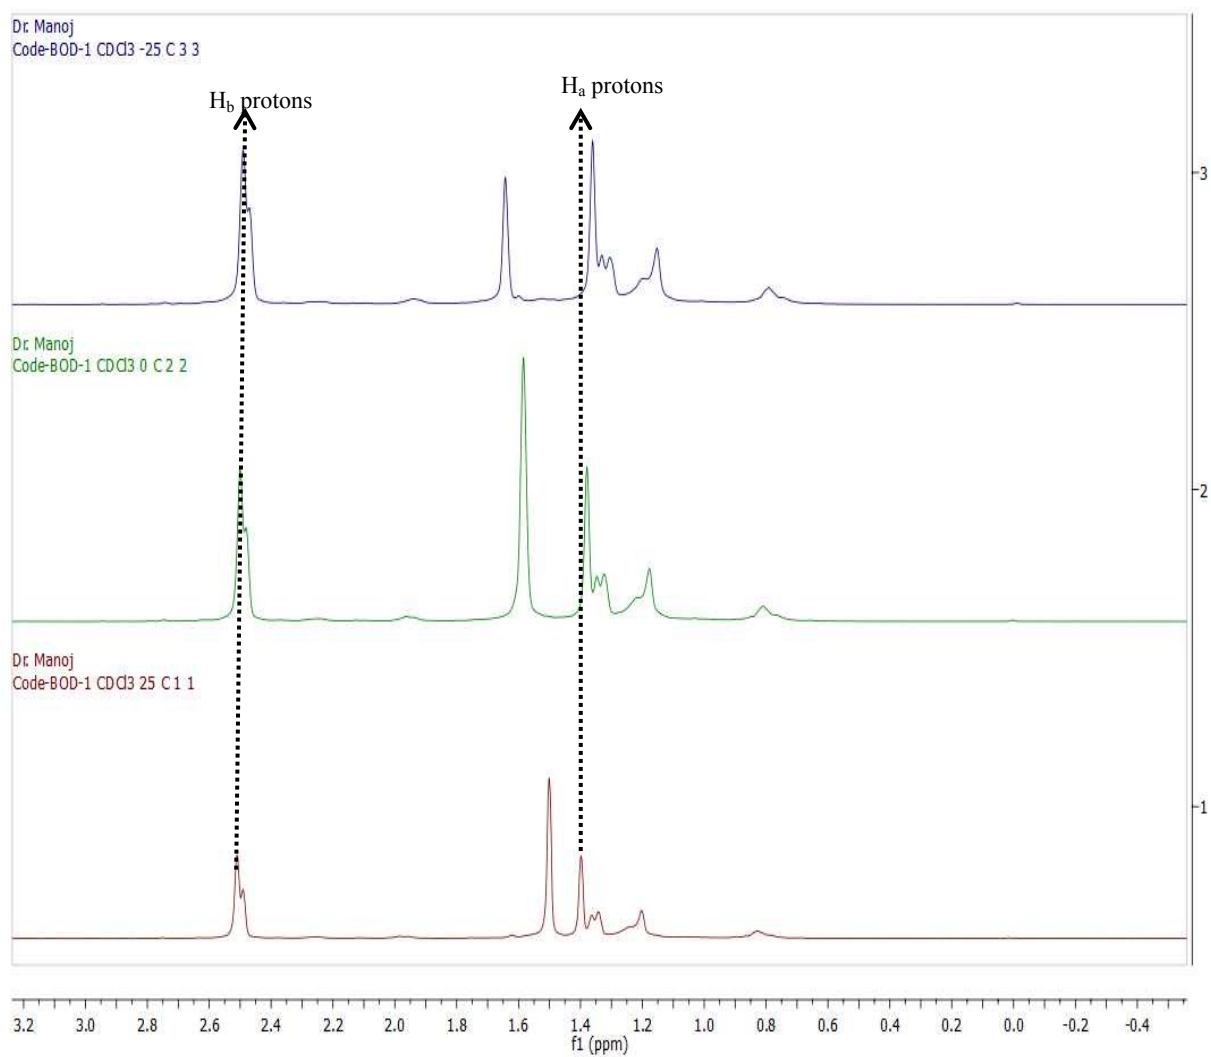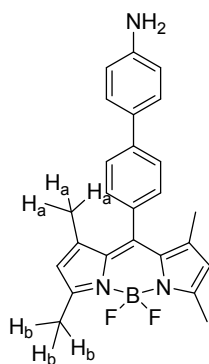

**Fig. S9:** VT- $^1\text{H}$  NMR spectra of probe 1

**VT-<sup>1</sup>H NMR spectra of probe 1 (superimposed spectra)**

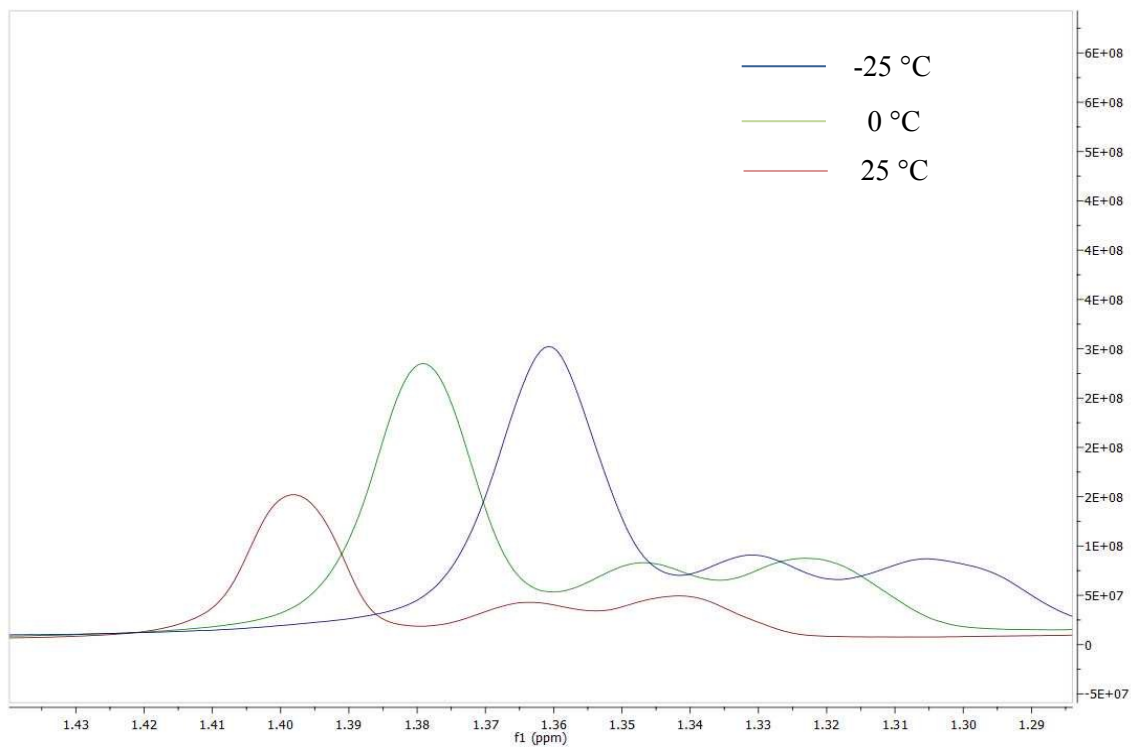

**Fig. S10:** VT- $^1\text{H}$  NMR spectra of probe **1** (superimposed spectra)

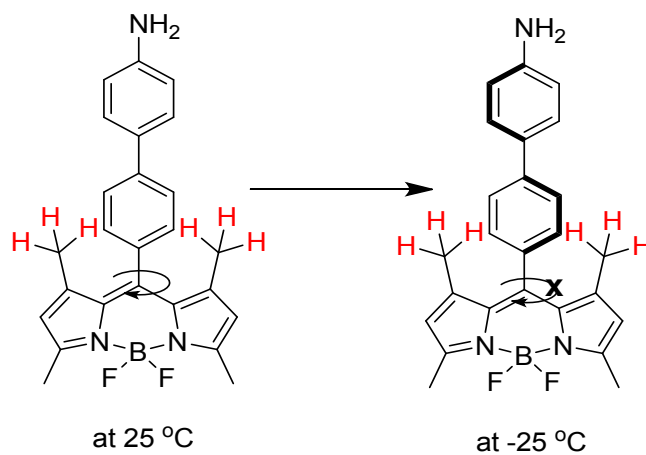

VT-<sup>1</sup>H NMR of probe **1** in CDCl<sub>3</sub>, the methyl hydrogen of 1 and 7 position (red colour) of bodipy have upfield shift about 0.04 ppm on changing temperature from 25 °C to -25 °C.

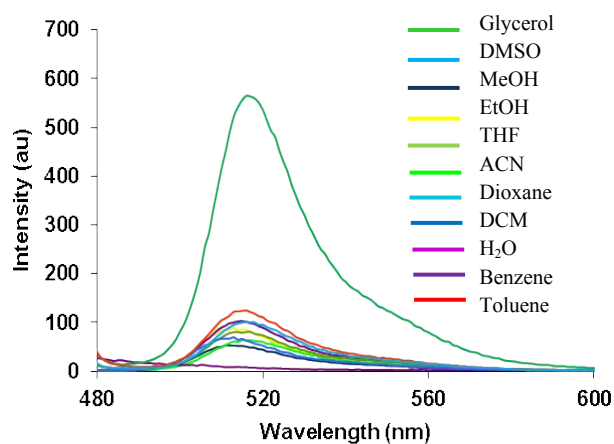

**Fig. S11:** Fluorescence spectra of probe **1** (5.0  $\mu\text{M}$ ) in different solvent system at 25  $^{\circ}\text{C}$ ;  $\lambda_{\text{ex}}$  = 470 nm and  $\lambda_{\text{em}}$  = 517.

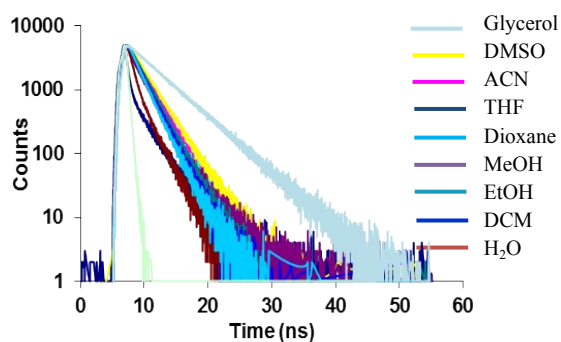

**Fig. S12:** Fluorescence lifetime spectra of probe **1** (5.0  $\mu\text{M}$ ) at 517 nm in different solvent system in 25  $^{\circ}\text{C}$ ;  $\lambda_{\text{ex}}$  = 488 nm.

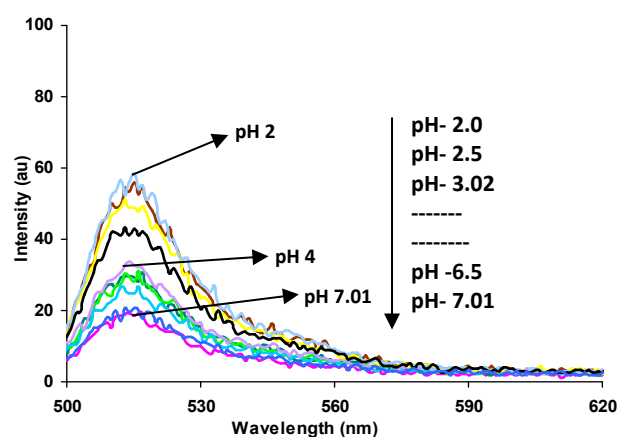

**Fig. S13:** Change in fluorescence spectra of probe **1** (5  $\mu\text{M}$ ) at different pH values ( $\lambda_{\text{ex}} = 470 \text{ nm}$  and  $\lambda_{\text{em}} = 517$ ).

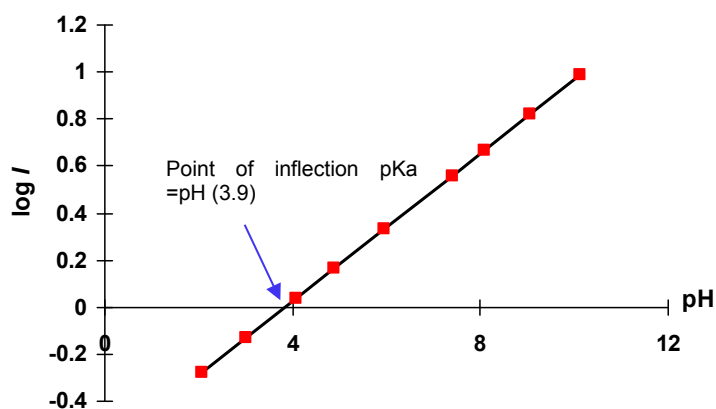

**Fig. S14:** The log I–pH\* plot for the probe **1**

\* **Calculations:** Using equation:  $\text{pKa} = m.H_{1/2} + \log I$ , where  $I = (\epsilon_{\text{obs}} - \epsilon_{\text{fb}}) / (\epsilon_{\text{ca}} - \epsilon_{\text{obs}})$  (at half protonation point log I will be equal to zero) from graph,  $\text{pKa} = H_{1/2} = 3.9$

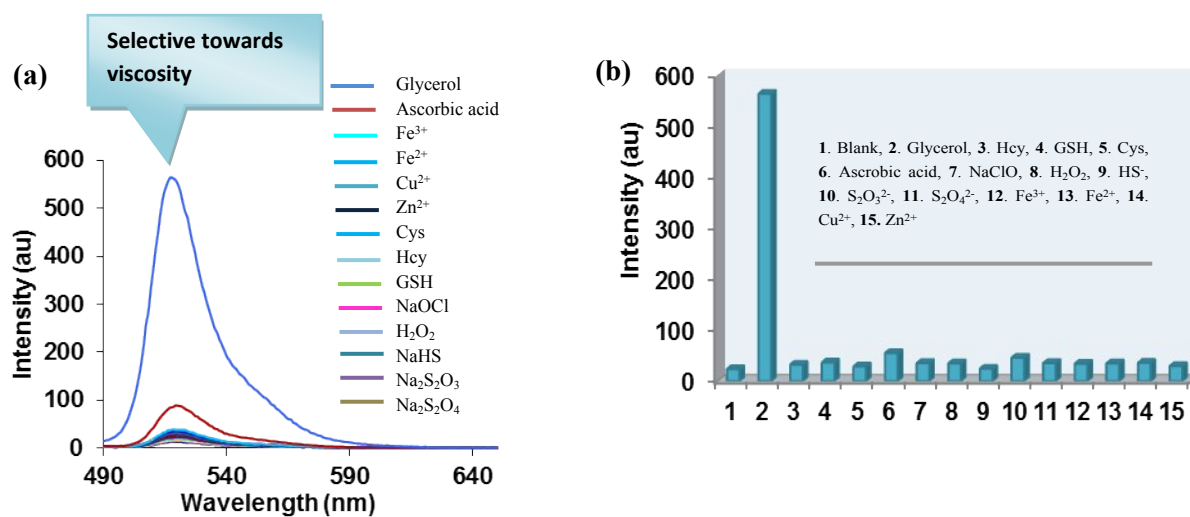

**Fig. S15:** (a) Fluorescence spectra and (b) Bar diagram of probe **1** (5.0  $\mu\text{M}$ ) in methanol with addition of different analytes (Cys, Hcy, GSH, NaClO, H<sub>2</sub>O<sub>2</sub>, NaHS, ascorbic acid, Na<sub>2</sub>S<sub>2</sub>O<sub>3</sub>, Na<sub>2</sub>S<sub>2</sub>O<sub>4</sub>, Fe<sup>3+</sup>, Fe<sup>2+</sup>, Cu<sup>2+</sup>, Zn<sup>2+</sup>) (100  $\mu\text{M}$ ) at 25 °C;  $\lambda_{\text{ex}}$  = 470 nm.

Representation of optimized geometry of probe 1 in gas phase

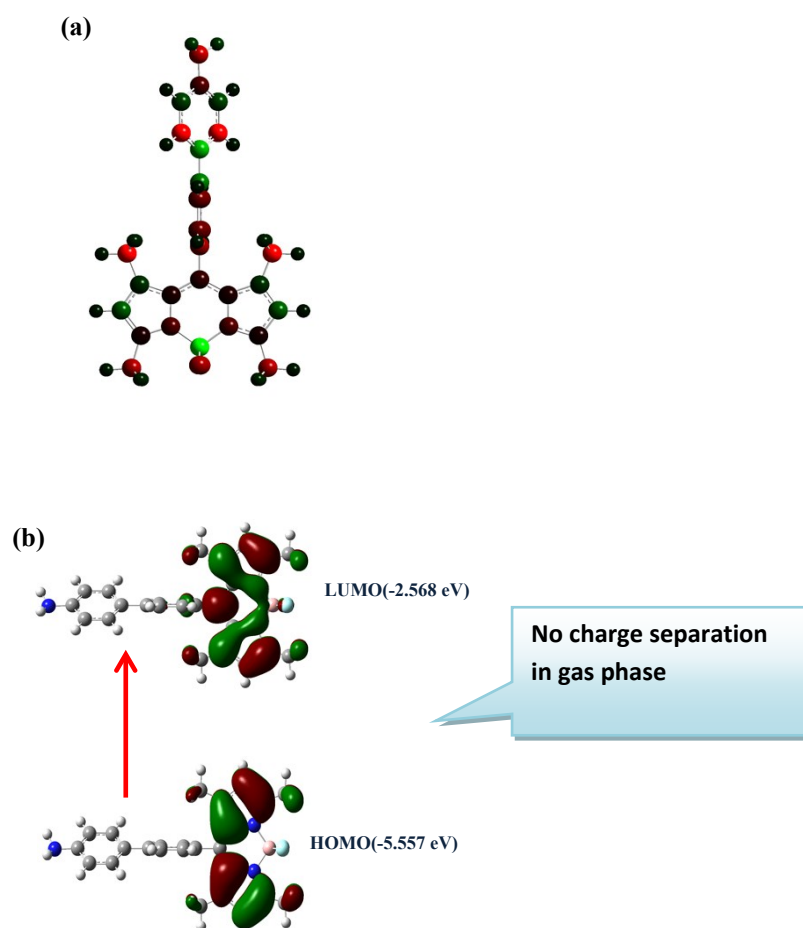

**Fig. S16:** (a) The optimized charge density geometry of probe 1. (b) Frontier molecular orbital (MO) of probe 1 showing no charge separation in gas phase.

**DFT studies of probe 1 in different solvents (polar and non-polar)**

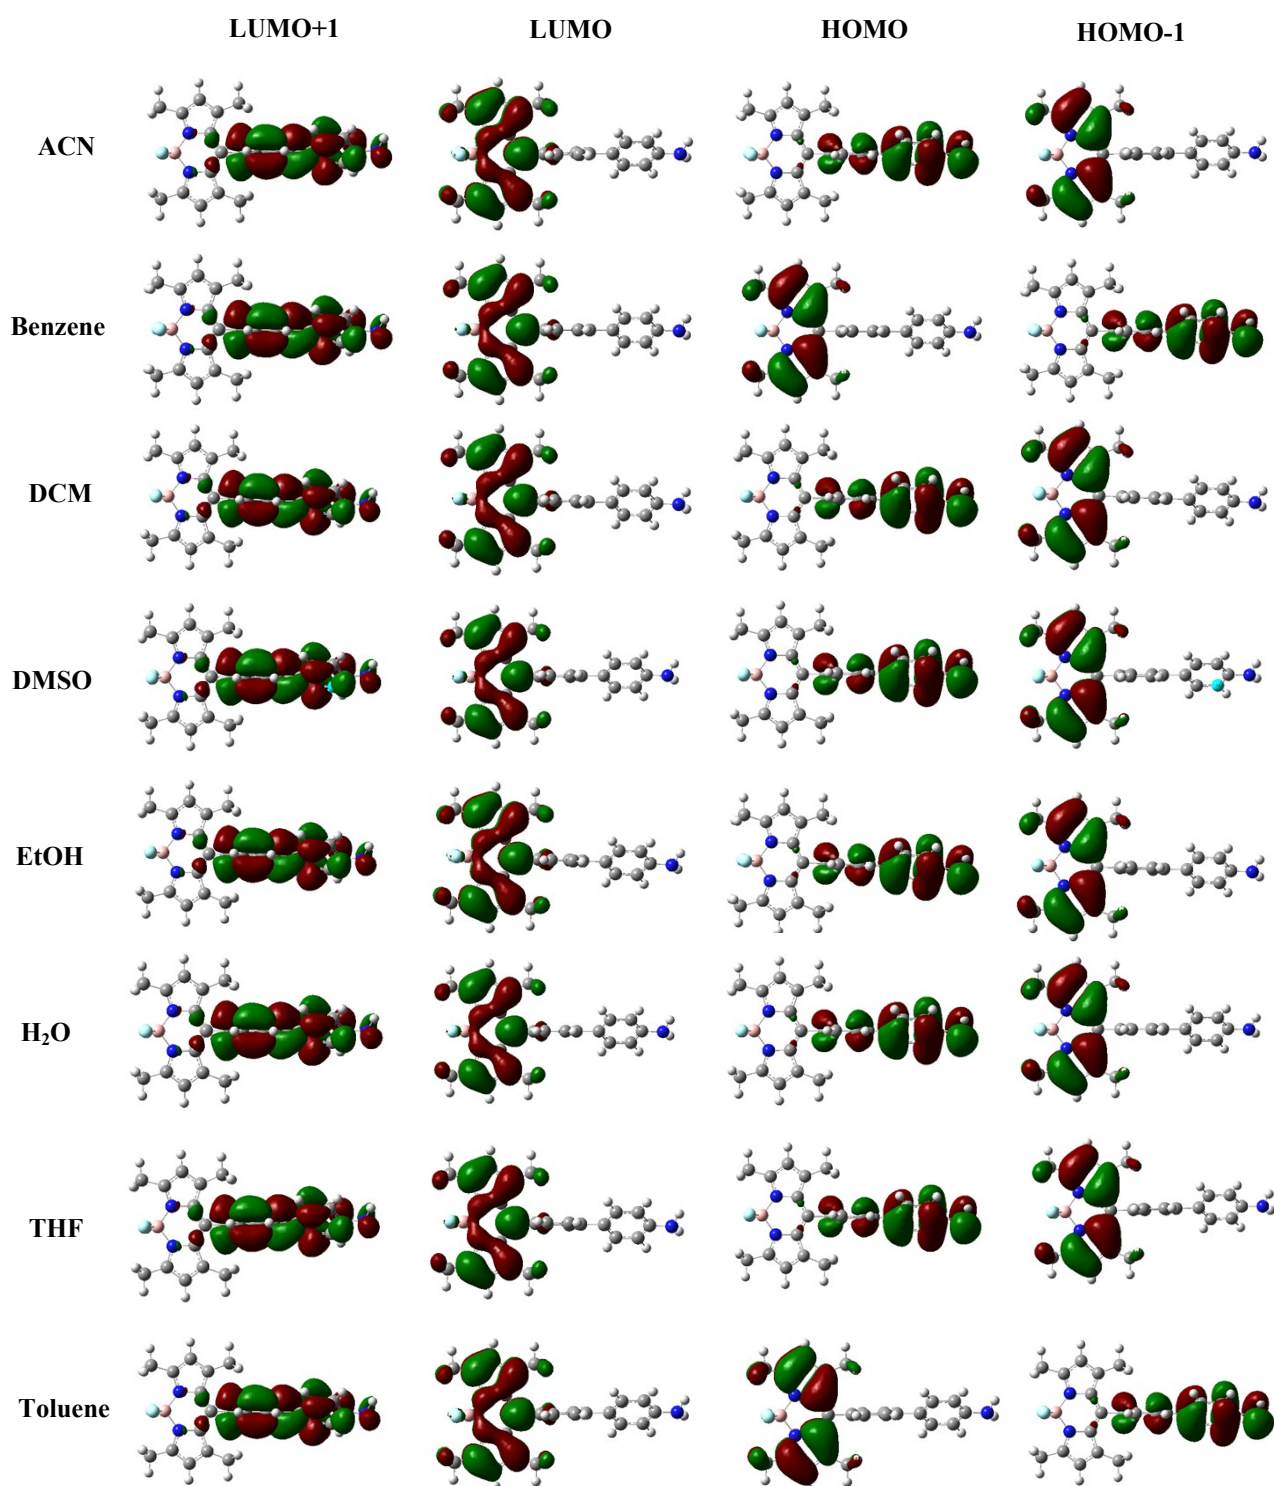

**Fig. S17:** Frontier molecular orbital (MO) of probe 1 by considering the effect of different solvents (polar and non-polar).

**Energy profile of probe 1 molecular orbitals in different solvents and at different dihedral angle**

| Solvent          | LUMO+1 (eV) | LUMO (eV) | HOMO (eV) | HOMO-1 (eV) | $\Delta_{\text{HOMO-LUMO}}$ (eV) |
|------------------|-------------|-----------|-----------|-------------|----------------------------------|
| ACN              | -0.772531   | -2.506441 | -5.392754 | -5.531804   | -2.886312                        |
| Benzene          | -0.760286   | -2.371201 | -5.383774 | -5.410441   | -3.012573                        |
| DCM              | -0.765728   | -2.472155 | -5.392210 | -5.494525   | -2.920054                        |
| DMSO             | -0.773347   | -2.509434 | -5.392754 | -5.534797   | -2.883319                        |
| Ethanol          | -0.771443   | -2.501271 | -5.392482 | -5.526090   | -2.891210                        |
| Methanol         | -0.772259   | -2.505353 | -5.392754 | -5.530444   | -2.887401                        |
| H <sub>2</sub> O | -0.774164   | -2.513244 | -5.393026 | -5.538879   | -2.879782                        |
| THF              | -0.764640   | -2.463719 | -5.392754 | -5.485273   | -2.92903                         |
| Toluene          | -0.760014   | -2.376099 | -5.389217 | -5.408809   | -3.013117                        |

**Fig. S18:** Energy profile of probe 1 molecular orbitals in different solvents

| Dihedral angle | LUMO+1 (eV) | LUMO (eV) | HOMO (eV) | HOMO-1 (eV) | $\Delta_{\text{HOMO-LUMO}}$ (eV) |
|----------------|-------------|-----------|-----------|-------------|----------------------------------|
| 90°            | -0.89634    | -2.45038  | -5.14513  | -5.37261    | -2. 69475                        |
| 120°           | -0.83511    | -2.48412  | -5.17397  | -5.36200    | -2. 68985                        |
| 150°           | -0. 69443   | -2.5586   | -5.2493   | -5.3456     | -2. 6907                         |
| 180°           | -0. 45476   | -2.96604  | -5.2586   | -5.32690    | -2. 29256                        |

**Fig. S19:** Energy profile of probe 1 molecular orbitals at different dihedral angle.



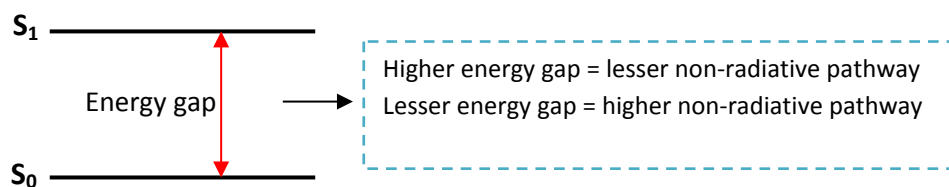

**Fig. S20:** Schematic representation of dependence of fluorescence emission on  $S_0$  - $S_1$  energy

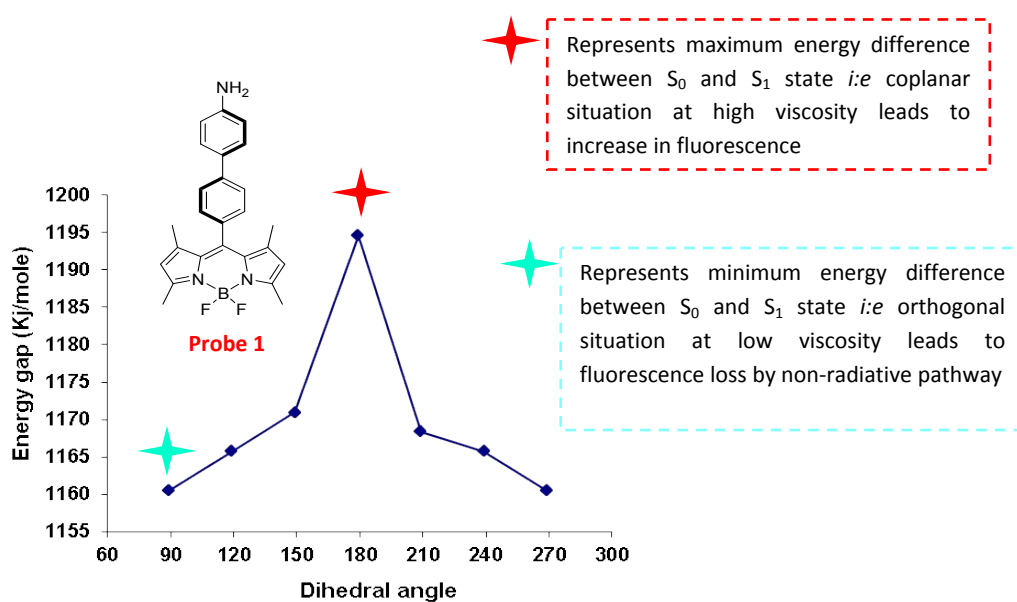

**Fig. S21:** Plot depicting the variation of  $S_0$  - $S_1$  energy gap at different dihedral angles in case of probe **1**

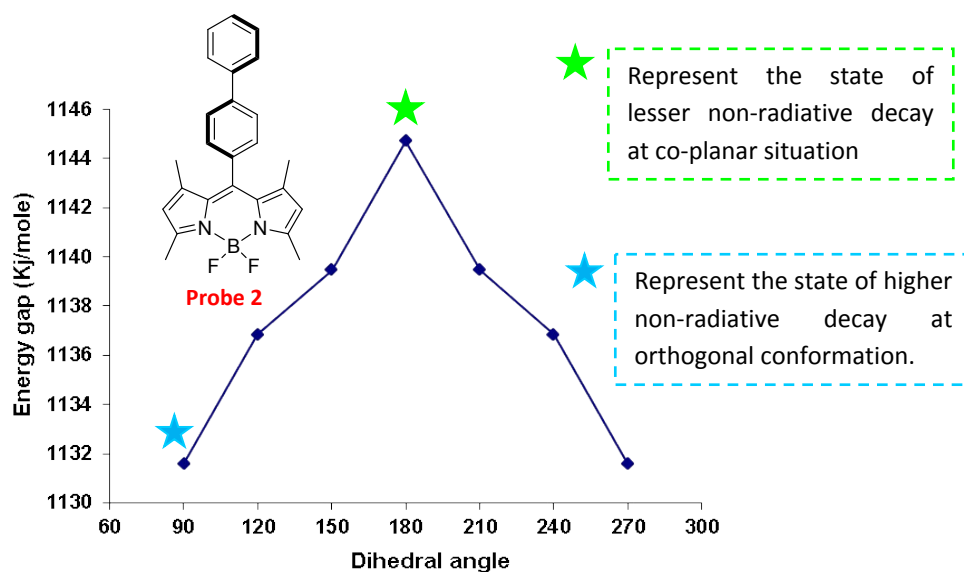

**Fig. S22:** Plot depicting the variation of  $S_0-S_1$  energy gap at different dihedral angles in case of compound 2

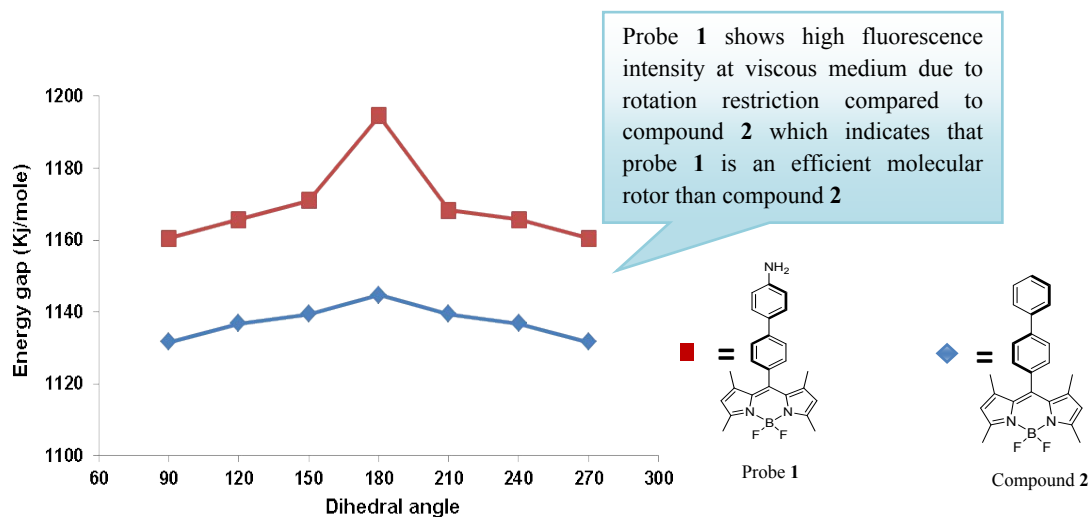

**Fig. S23:** Combined plot depicting the variation of  $S_0-S_1$  energy gap at different dihedral angles for probe 1 and compound 2

### Cytotoxicity analysis

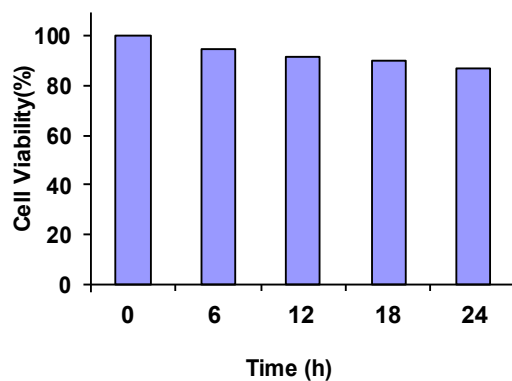

**Fig. S24:** Cell viability of probe **1** (5.0  $\mu\text{M}$ ) at different time intervals

### Fluorescence titration of probe 1 with retinoic acid

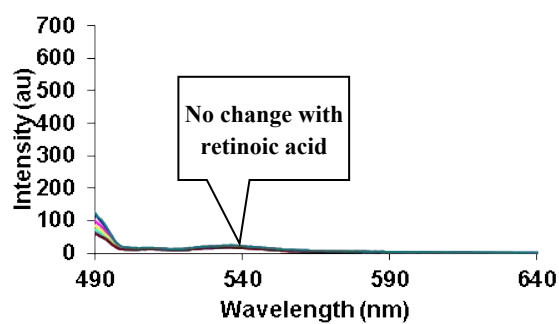

**Fig. S25:** Fluorescence spectra of probe **1** (5.0  $\mu\text{M}$ ) in water on addition of retinoic acid (30  $\mu\text{M}$ ) at 25  $^{\circ}\text{C}$ ;  $\lambda_{\text{ex}}$  = 470 nm and  $\lambda_{\text{em}}$  = 517 nm.

**Intensity analysis of probe 1 in cell based model system**

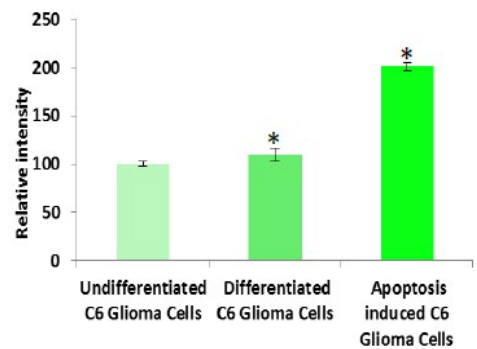

**Fig. S26:** Histogram depicts the relative expression of the probe 1 in different groups “\*” represent statistical significant difference among groups.

**Flow cytometer and immunocytofluorescence studies in cell based model system**

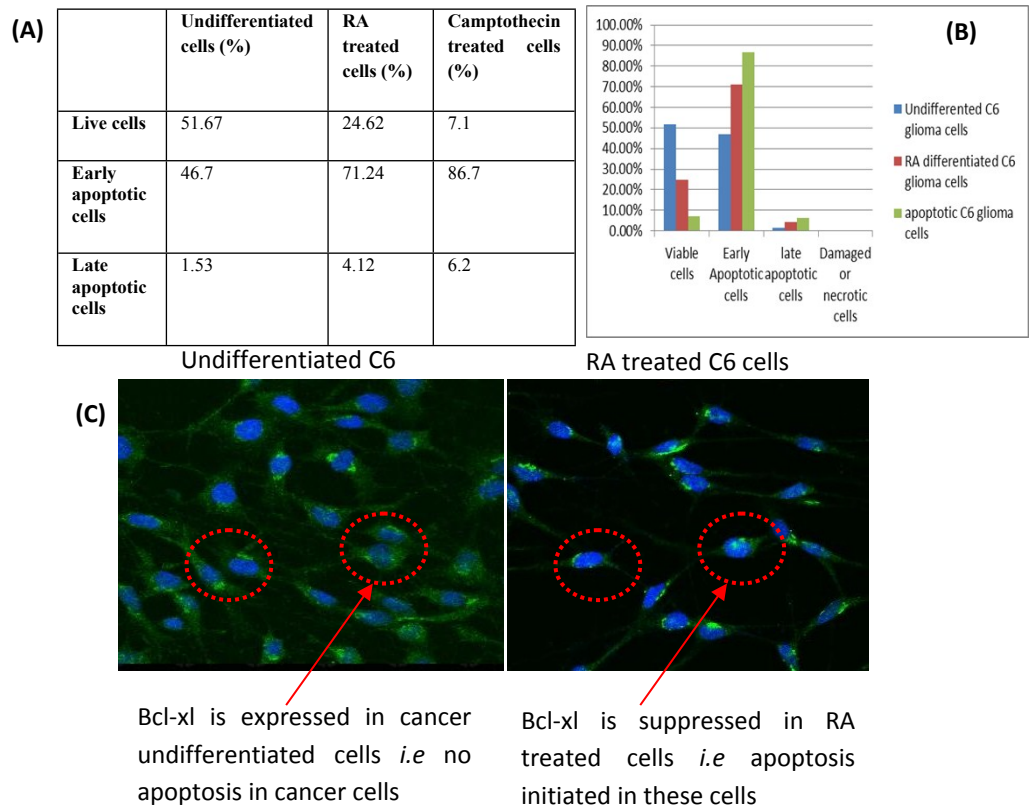

**Fig. S27:** (A) and (B) showing the percentage of live, early apoptotic and late apoptotic cells in cell based model system. (C) Expression of Bcl-xl in undifferentiated and Retinoic treated C6 glial cells by immunocytofluorescence.

**Cell imaging and intensity analysis of probe 1 in cell based model system of cancer and normal cells**

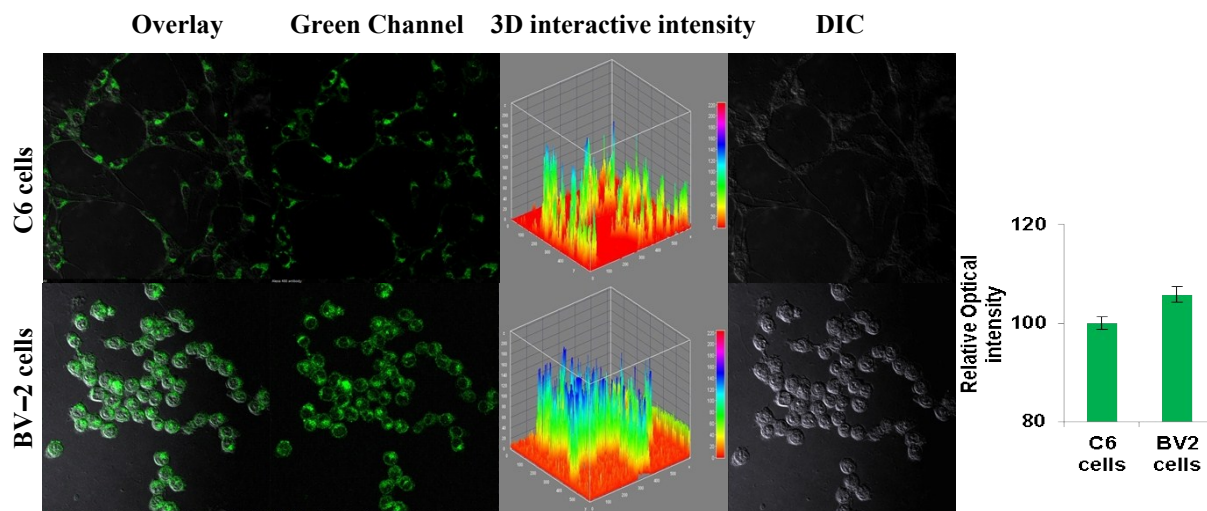

**Fig. S28:** Fluorescence imaging of probe **1** expression in C6 glioma (undifferentiated cells) and BV-2 (normal) cells. Cells were incubated with probe **1** (5.0  $\mu\text{M}$ ) for 30 min. (a), (d) represents DIC of C6 and BV-2 cell; (b), (e) represents the green channel of C6 and BV-2 cells; (c) and (f) represents the overlay of C6 and BV2 cells. Images are acquired by using excitation and emission windows of  $\lambda_{\text{ex}} = 488$  and  $\lambda_{\text{em}} = 500\text{--}550$  nm, respectively; Scale bars: 50  $\mu\text{m}$ .

**Control experiment of probe1 in C6 glial cells without addition of camptothecin**

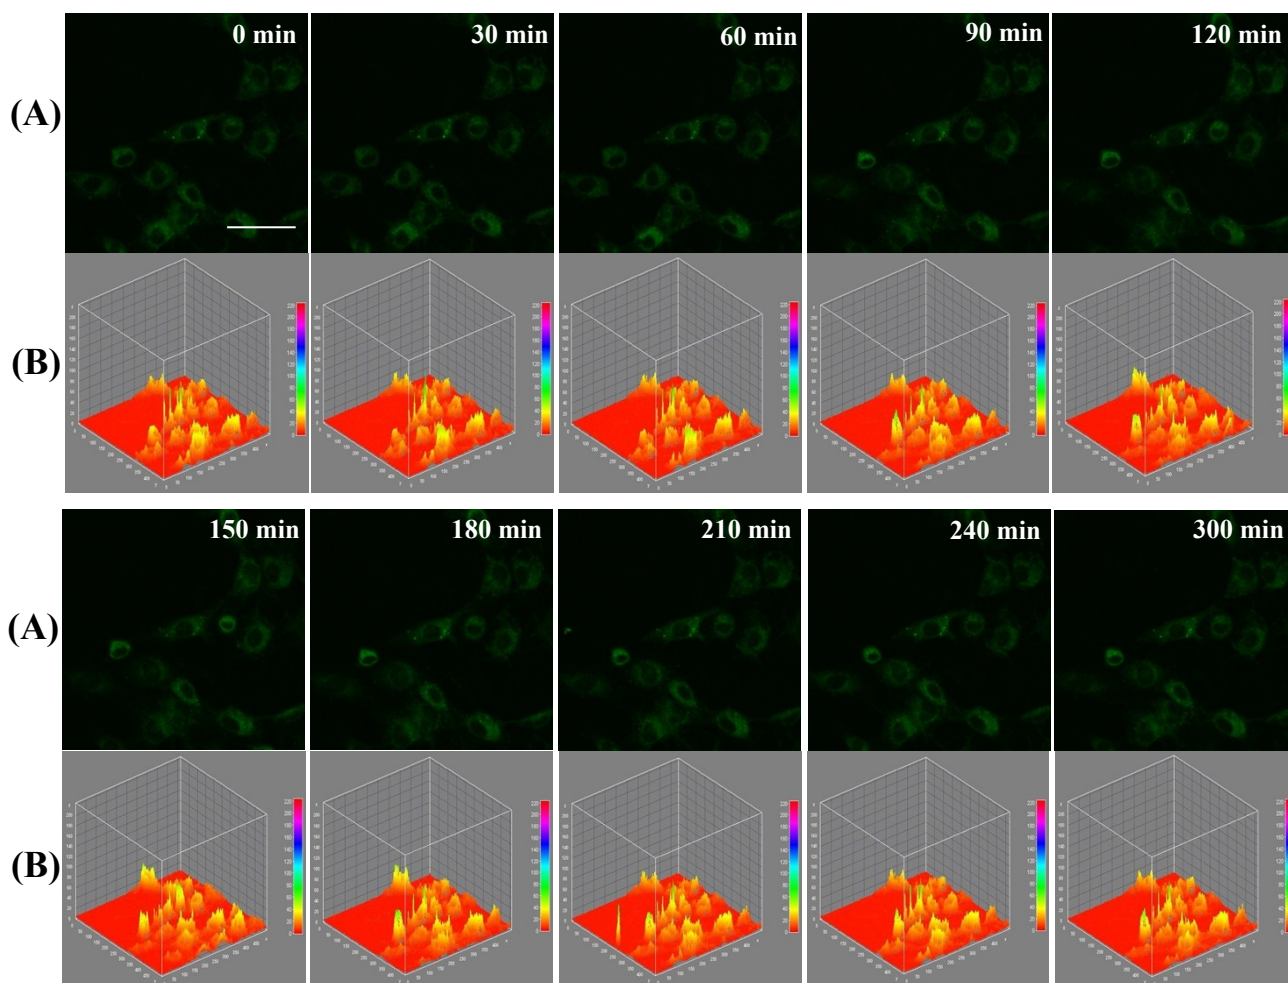

**Fig. S29:** Fluorescence images of C6 glioma cells incubated with 5.0 μM probe **1** at different time points after addition. Images are acquired by using excitation and emission windows of  $\lambda_{\text{ex}} = 488$  and  $\lambda_{\text{em}} = 500\text{--}550$  nm, respectively; Scale bars: 50 μm

**TCSPC histogram and lifetime in different cell model system.**

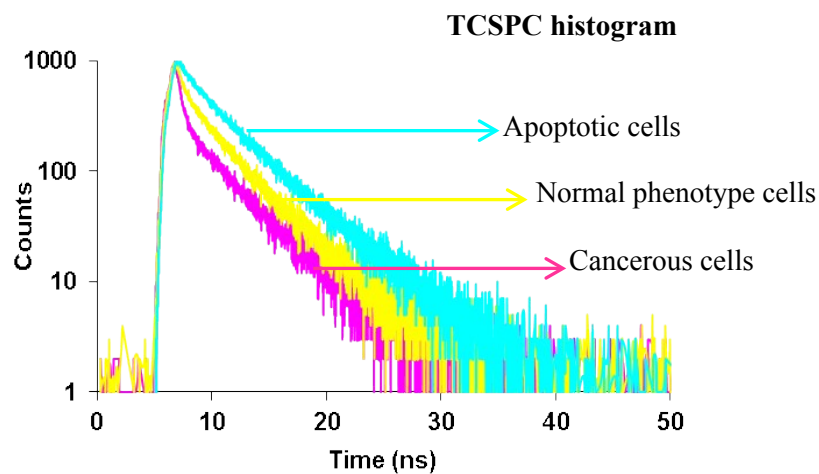

**Fig. S30:** The decay curves in the TCSPC histogram; Sky blue is represents the apoptotic cells, yellow line represents the normal phenotype cells and pink line represents cancerous cells.

**Table S2:** Lifetime of probe **1** in different cell model system.

| Cells                  | Lifetime (ns) | $\chi^2$ value |
|------------------------|---------------|----------------|
| Cancerous cells        | 2.82          | 0.9227         |
| Normal phenotype cells | 3.02          | 0.9626         |
| Apoptotic cells        | 3.26          | 0.9892         |

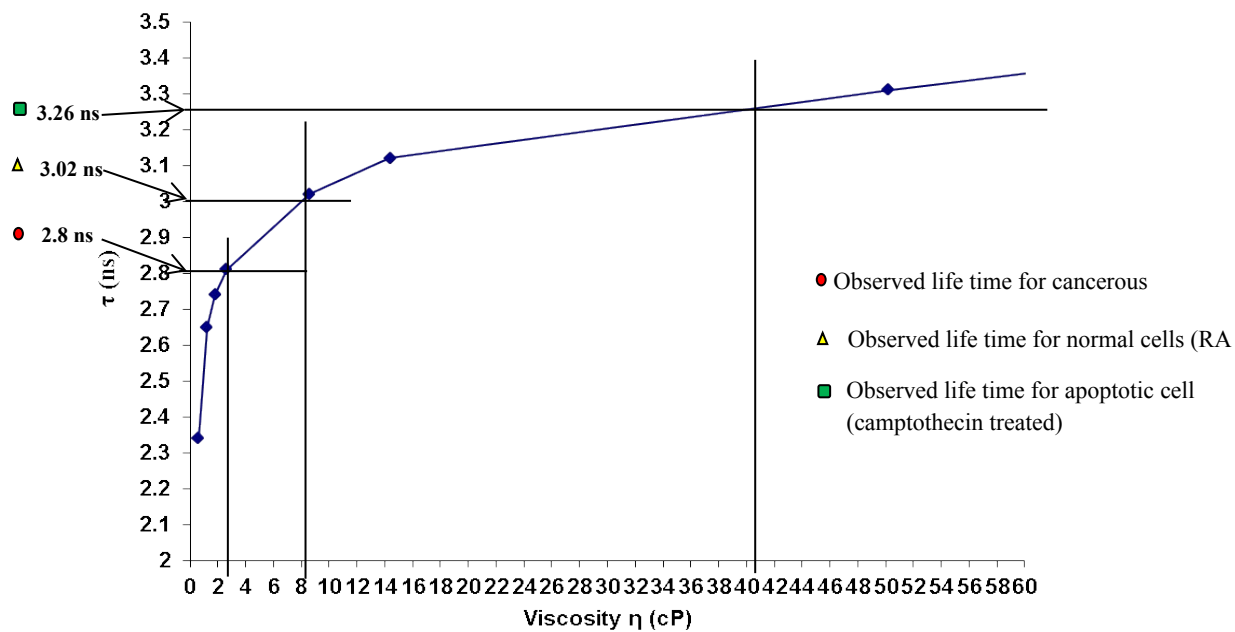

**Fig. S31:** The life time for probe **1** recorded in methanol-glycerol mixtures of various compositions, plotted against the viscosity of mixtures (for calibration).



### **Cell culture and treatments**

C6 glioma cell was obtained from National Centre for Cell Sciences, Pune, India. Cells were maintained in DMEM supplemented with 1X PSN (GIBCO), 10% FBS (Biological Industries) at 37°C and humid environment containing 5% CO<sub>2</sub>. For fluorescence detection, cells were seeded on 18 mm coverslips in 24 well plates. For the purpose of the study, three groups were chosen: **I.** Differentiated cells, for which undifferentiated C6 glioma cells were treated with 10 µM RA after every 24 h for 4 days to induce differentiation of glioma cells as inducing differentiation is one of effective method of treating gliomas. Then cells were exposed to the 5.0 µM probe **1** for 30 min. **II.** Undifferentiated cancerous C6 glioma cells and **III.** Apoptotic cells for which undifferentiated C6 glioma cells were treated with 100 µM Camptothecin then with 5.0 µM of probe **1** exposure for 24 hours.

### **For Fluorescence Detection**

Cell of different group after their required treatments were then washed with 1X PBS thrice for 5 minutes each and then observed under confocal microscope. All images were taken with A1R Nikon Laser Scanning Confocal microscope using 488 nm laser.

### **Fluorescence lifetime imaging**

After cell treatment, lifetime images were captured with an inverted-type laser scanning confocal microscope with a 60X objective. The emission was collected through a 500 ± 30 nm band pass filter.

### **Statistical analysis**

Values are expressed as mean ± SEM. The SigmaStat for Windows (version 3.5) was adopted to analyse the results by One Way ANOVA test in order to determine the significance of the means. Values of  $p < 0.05$  were considered as statistically significant.
